# Supplementary material
Source: PubMed Central journal article supplement (PMC4136339)
Supplement: JVI.00647-14_zjv999099441so1.pdf [file JVI.00647-14_zjv999099441so1.pdf]

# **Predicting the impact of CD8<sup>+</sup> T cell polyfunctionality on HIV disease progression - Supplemental Material**

Frederik Graw<sup>1,2,\*</sup> and Roland R. Regoes<sup>2</sup>

<sup>1</sup>Center for Modeling and Simulation in the Biosciences, Heidelberg University, Heidelberg,  
Germany

<sup>2</sup>Institute of Integrative Biology, ETH Zurich, Zurich, Switzerland

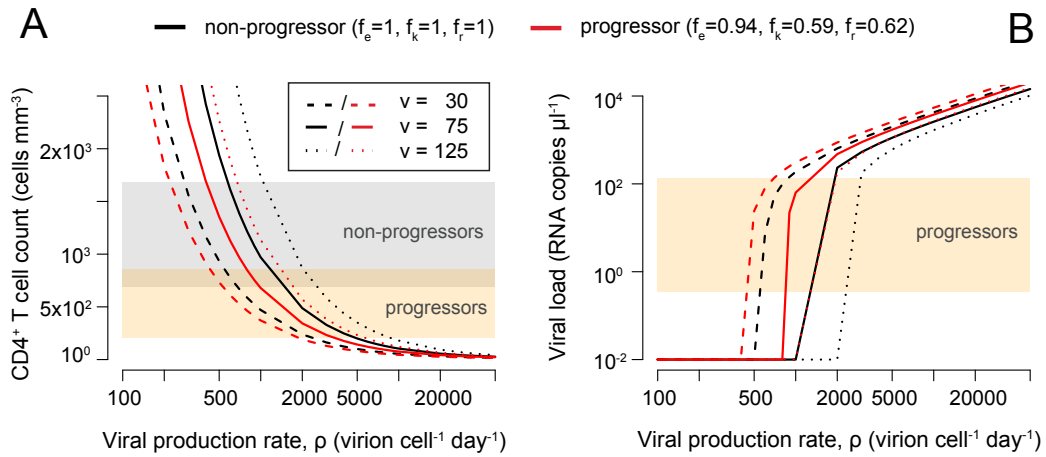

**Figure S1:** Development of CD4<sup>+</sup> T cell count (**A**) and plasma viral load (**B**) at steady state as described in Eqs. (2) and (3) in the main manuscript, respectively, dependent on different parameterizations of the viral production rate,  $\rho$ . The model is either parameterized with a fully functional CD8<sup>+</sup> T cell response (*black*), or with a dysfunctional CD8<sup>+</sup> T cell response as observed for HIV-progressors (*red*). The results for three different scaling factors in the estimated range of  $\nu$  are shown. Grey and orange shaded areas indicate the 10%-90% percentiles of observed CD4<sup>+</sup> T cell counts and plasma viral loads in HIV progressors and non-progressors out of Betts et al. (2006) (see also Table 2 in the manuscript).



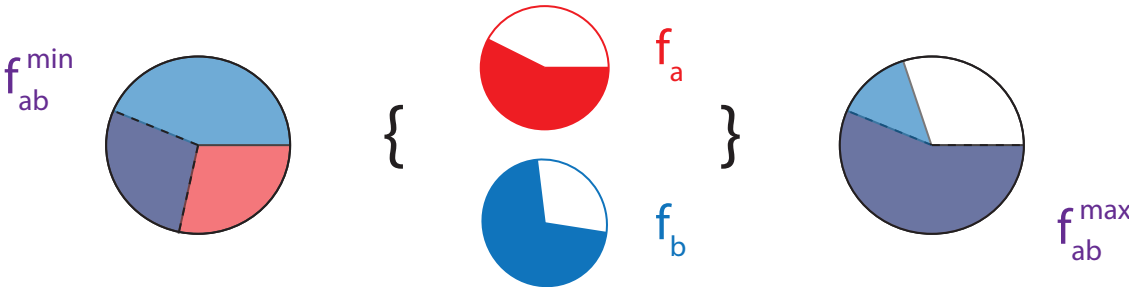

**Figure S3: Range of  $f_{ab}$ :** Sketch of the possible minimal,  $f_{ab}^{\min}$ , and maximal,  $f_{ab}^{\max}$ , observable values for  $f_{ab}$  given  $f_a$  and  $f_b$ .



**Table S1: Independent expression of specific functionalities:** If two functionalities,  $a$  and  $b$ , are independent of each other, then the measured frequency of CD8<sup>+</sup> T cells expressing both functions,  $f_{ab}$ , should be the product of the frequencies of CD8<sup>+</sup> T cells expressing the one or the other functionality, hence,  $f_{ab} = f_a \times f_b$ . To test for independence, the scaled difference  $\tilde{\Delta} = (f_{ab} - (f_a \times f_b)) / (f_{ab}^{\max} - f_{ab}^{\min})$  was calculated for each patient of Betts et al., *Blood* 2006 (see *Materials & Methods*). The table shows the  $p$ -values corrected for multiple comparisons for comparing  $\tilde{\Delta}$  to 0 (Wilcoxon-test). For  $p$ -values larger than 0.05, the null-hypothesis that the two functionalities are expressed independently cannot be rejected.

|                                | CD107a | IFN- $\gamma$ | MIP-1 $\beta$ | IL-2   | TNF- $\alpha$ |
|--------------------------------|--------|---------------|---------------|--------|---------------|
| <b>ENV</b>                     |        |               |               |        |               |
| <b>CD107a</b>                  | -      | 0.06          | 1             | 1      | <0.005        |
| <b>IFN-<math>\gamma</math></b> | 0.06   | -             | 0.19          | 1      | <0.01         |
| <b>MIP-1<math>\beta</math></b> |        |               | -             | <0.003 | 1             |
| <b>IL-2</b>                    |        |               |               | -      | 1             |
| <b>TNF-<math>\alpha</math></b> |        |               |               |        | -             |
| <b>GAG</b>                     |        |               |               |        |               |
| <b>CD107a</b>                  | -      | 0.015         | 1             | 1      | <0.001        |
| <b>IFN-<math>\gamma</math></b> |        | -             | <0.004        | <0.006 | <0.001        |
| <b>MIP-1<math>\beta</math></b> |        |               | -             | 0.03   | 1             |
| <b>IL-2</b>                    |        |               |               | -      | <0.001        |
| <b>TNF-<math>\alpha</math></b> |        |               |               |        | -             |
| <b>NEF</b>                     |        |               |               |        |               |
| <b>CD107a</b>                  | -      | <0.005        | 1             | 1      | 0.02          |
| <b>IFN-<math>\gamma</math></b> |        | -             | 0.02          | 1      | <0.001        |
| <b>MIP-1<math>\beta</math></b> |        |               | -             | 0.61   | 1             |
| <b>IL-2</b>                    |        |               |               | -      | 0.01          |
| <b>TNF-<math>\alpha</math></b> |        |               |               |        | -             |
| <b>POL</b>                     |        |               |               |        |               |
| <b>CD107a</b>                  | -      | 0.09          | 1             | 1      | <0.001        |
| <b>IFN-<math>\gamma</math></b> |        | -             | <0.003        | 0.67   | <0.001        |
| <b>MIP-1<math>\beta</math></b> |        |               | -             | 1      | 1             |
| <b>IL-2</b>                    |        |               |               | -      | <0.001        |
| <b>TNF-<math>\alpha</math></b> |        |               |               |        | -             |
| <b>TRVVV</b>                   |        |               |               |        |               |
| <b>CD107a</b>                  | -      | 1             | 1             | 1      | 0.12          |
| <b>IFN-<math>\gamma</math></b> |        | -             | 0.1           | 1      | <0.002        |
| <b>MIP-1<math>\beta</math></b> |        |               | -             | 0.52   | 1             |
| <b>IL-2</b>                    |        |               |               | -      | 0.08          |
| <b>TNF-<math>\alpha</math></b> |        |               |               |        | -             |
